# Supplementary material for: Early Pregnancy Exposure to Ambient Air Pollution among Late-Onset Preeclamptic Cases Is Associated with Placental DNA Hypomethylation of Specific Genes and Slower Placental Maturation
Source: MDPI journal article supplement (doi:10.3390/toxics9120338), 2021-12-06

# Supplementary Materials: Early Pregnancy Exposure to Ambient Air Pollution among Late-Onset Preeclamptic Cases is Associated with Placental DNA Hypomethylation of Specific Genes and Slower Placental Maturation

Karin Engström, Yumjirmaa Mandakh, Lana Garmire, Zahra Masoumi, Christina Isaxon, Ebba Malmqvist, Lena Erlandsson and Stefan R. Hansson

**Table S1.** Differences in gestational age between combined PE status and NO<sub>x</sub> exposure groups, analysed using linear regression.

| PE status and NO <sub>x</sub> group | beta <sup>a</sup> | Std error | P-value   |
|-------------------------------------|-------------------|-----------|-----------|
| 1. Controls, low NO <sub>x</sub>    | reference         | reference | reference |
| 2. Controls, high NO <sub>x</sub>   | -0.14             | 0.23      | 0.53      |
| 3. Cases, low NO <sub>x</sub>       | -0.28             | 0.36      | 0.44      |
| 4. Cases, high NO <sub>x</sub>      | -0.61             | 0.28      | 0.035*    |
| Model p-value                       |                   |           | 0.20      |

<sup>a</sup>Beta is derived from the following linear model: Epigenetic age = intercept +  $\beta_1$  \* PE status and NO<sub>x</sub> group combination (categorical).

**Table S2.** Differentially methylated positions (DMPs) when comparing controls with high NO<sub>x</sub> exposure, (reference) vs. PE cases with high NO<sub>x</sub> exposure in pregnancies with female fetuses. The twelve DMPs with lowest q-value are already presented in Table 2 in the main text, thus the DMPs presented here are the DMPs ordered 14–50 ranked by q-value.

| Cpg        | Chr | Gene            | Gene name                                                 | 2 <sup>logFC</sup><br>(95% CI) <sup>a</sup> | Beta <sup>b</sup> | p-value     | q-value |
|------------|-----|-----------------|-----------------------------------------------------------|---------------------------------------------|-------------------|-------------|---------|
| cg15812969 | 21  | USP25           | ubiquitin specific peptidase 25                           | 0.71 (0.63, 0.80)                           | 0.41              | 0.000000339 | 0.019   |
| cg22356173 | 17  | CLUH            | clustered mitochondria homolog                            | 0.59 (0.49, 0.71)                           | 0.05              | 0.000000350 | 0.019   |
| cg10926412 | 13  | NA <sup>c</sup> |                                                           | 0.61 (0.51, 0.72)                           | 0.40              | 0.000000385 | 0.020   |
| cg25030347 | 17  | RPTOR           | regulatory associated protein of<br>MTOR complex 1        | 0.43 (0.32, 0.57)                           | 0.88              | 0.000000448 | 0.022   |
| cg06343806 | 7   | NA              |                                                           | 0.62 (0.52, 0.73)                           | 0.36              | 0.000000541 | 0.022   |
| cg17936567 | 22  | TAB1            | TGF-beta activated kinase 1<br>(MAP3K7) binding protein 1 | 0.74 (0.67, 0.82)                           | 0.28              | 0.000000549 | 0.022   |

|            |    |           |                                                                            |                   |      |             |       |
|------------|----|-----------|----------------------------------------------------------------------------|-------------------|------|-------------|-------|
| cg13923903 | 22 | ZNRF3     | zinc and ring finger 3                                                     | 0.70 (0.61, 0.79) | 0.40 | 0.000000587 | 0.022 |
| cg25141112 | 8  | LINC01298 | long intergenic non-protein coding RNA 1298(LINC01298)                     | 0.71 (0.64, 0.80) | 0.61 | 0.000000615 | 0.022 |
| cg26187194 | 10 | NA        |                                                                            | 2.91 (2.00, 4.23) | 0.70 | 0.000000623 | 0.022 |
| cg10590292 | 12 | BIN2      | bridging integrator 2                                                      | 0.44 (0.33, 0.59) | 0.68 | 0.000000626 | 0.022 |
| cg23745445 | 15 | ANP32A    | acidic nuclear phosphoprotein 32 family member A                           | 0.65 (0.56, 0.76) | 0.23 | 0.000000628 | 0.022 |
| cg18686217 | 3  | DAG1      | dystroglycan 1                                                             | 0.67 (0.58, 0.77) | 0.61 | 0.000000829 | 0.024 |
| cg18014788 | 18 | PTPRM     | protein tyrosine phosphatase, receptor type M                              | 0.52 (0.41, 0.65) | 0.84 | 0.000000869 | 0.024 |
| cg01234517 | 7  | ACTR3C    | ARP3 actin-related protein 3 homolog C                                     | 0.48 (0.37, 0.63) | 0.79 | 0.000000930 | 0.024 |
| cg08304968 | 20 | NA        |                                                                            | 0.66 (0.56, 0.76) | 0.53 | 0.000000945 | 0.024 |
| cg04728805 | 5  | FAM53C    | family with sequence similarity 53 member C                                | 0.64 (0.55, 0.75) | 0.10 | 0.000000976 | 0.024 |
| cg16849481 | 11 | SPDYC     | speedy/RINGO cell cycle regulator family member C                          | 0.69 (0.61, 0.79) | 0.39 | 0.000000995 | 0.024 |
| cg06154002 | 14 | TDRD9     | tudor domain containing 9                                                  | 2.47 (1.79, 3.41) | 0.33 | 0.000001008 | 0.024 |
| cg16414660 | 2  | DGKD      | diacylglycerol kinase delta(DGKD)                                          | 0.59 (0.49, 0.72) | 0.70 | 0.000001046 | 0.024 |
| cg01584478 | 4  | LRBA      | LPS responsive beige-like anchor protein                                   | 0.62 (0.52, 0.73) | 0.43 | 0.000001080 | 0.024 |
| cg11548591 | 9  | DAB2IP    | DAB2 interacting protein                                                   | 0.54 (0.43, 0.67) | 0.67 | 0.000001112 | 0.024 |
| cg23502295 | 6  | MICAL1    | microtubule associated monooxygenase, calponin and LIM domain containing 1 | 0.68 (0.59, 0.78) | 0.81 | 0.000001116 | 0.024 |
| cg16013484 | 5  | NA        |                                                                            | 0.59 (0.48, 0.71) | 0.72 | 0.000001164 | 0.024 |
| cg17971961 | 1  | KIAA0319L | KIAA0319 like                                                              | 0.67 (0.59, 0.78) | 0.69 | 0.000001169 | 0.024 |
| cg07249517 | 3  | MB21D2    | Mab-21 domain containing 2                                                 | 0.70 (0.62, 0.80) | 0.55 | 0.000001188 | 0.024 |
| cg02712011 | 3  |           |                                                                            | 0.65 (0.56, 0.76) | 0.11 | 0.000001233 | 0.024 |
| cg25473467 | 6  | ANKRD6    | ankyrin repeat domain 6                                                    | 0.62 (0.53, 0.74) | 0.12 | 0.000001254 | 0.024 |
| cg25569590 | 7  | COBL      | cordon-bleu WH2 repeat protein                                             | 0.55 (0.44, 0.68) | 0.24 | 0.000001265 | 0.024 |
| cg19581707 | 22 | SLC25A18  | solute carrier family 25 member 18                                         | 0.68 (0.59, 0.78) | 0.30 | 0.000001281 | 0.024 |

|            |    |          |                                                     |                   |      |             |       |
|------------|----|----------|-----------------------------------------------------|-------------------|------|-------------|-------|
| cg22490758 | 11 | PC       | pyruvate carboxylase                                | 0.71 (0.63, 0.81) | 0.71 | 0.000001302 | 0.024 |
| cg07326313 | 15 | NA       |                                                     | 0.56 (0.45, 0.69) | 0.30 | 0.000001316 | 0.024 |
| cg24025567 | 7  | CUX1     | cut like homeobox 1                                 | 0.68 (0.60, 0.79) | 0.56 | 0.000001344 | 0.024 |
| cg11071407 | 6  | PPARD    | peroxisome proliferator activated<br>receptor delta | 0.61 (0.50, 0.73) | 0.61 | 0.000001397 | 0.024 |
| cg05844827 | 17 | MSI2     | musashi RNA binding protein 2                       | 0.62 (0.53, 0.74) | 0.45 | 0.000001432 | 0.024 |
| cg00821201 | 20 | DSTN     | destrin, actin depolymerizing factor                | 0.63 (0.53, 0.75) | 0.51 | 0.000001509 | 0.024 |
| cg12906748 | 11 | C11orf16 | chromosome 11 open reading frame<br>16              | 0.63 (0.54, 0.75) | 0.56 | 0.000001512 | 0.024 |
| cg25688280 | 6  | RANBP9   | RAN binding protein 9                               | 0.69 (0.60, 0.79) | 0.39 | 0.000001514 | 0.024 |

Abbreviations: Chr, chromosome; CI, confidence interval;  $q$ -value, False discovery rate (FDR)-adjusted  $p$ -value using the Benjamini-Hochberg method; FC, fold change. <sup>a</sup> $2^{\log FC}$ , binary logarithmic fold change. LogFC denotes  $\beta_i$  from the following robust regression model: M-value =  $\beta_1 \times \text{PE/NO}_x \text{ group} + \beta_2 \times \text{DNA concentration} + \beta_3 \times \text{gestational age} + \beta_4 \times \text{estimated fraction Hofbauer cells} + \beta_5 \times \text{estimated fraction Syncytiotrophoblast cells}$ . <sup>b</sup>Average methylation state, expressed as Beta-value, for all study participants, ranging from 0 to 1 (1 means fully methylated). <sup>c</sup>NA, not annotated, i.e., the CpG is not present in any known gene.

**Table S3.** Top Gene Ontology (GO) terms for analyses including genes with CpGs with  $q < 0.1$  in the DMP analyses for different combined PE status and NO<sub>x</sub> group comparisons.

| GO ID                                                                                                                                  | Term                                                                                            | Total Nr of genes in Term | Nr of genes from DMPs with $q < 0.1$ | unadjusted $p$ -value | $q$ -value |
|----------------------------------------------------------------------------------------------------------------------------------------|-------------------------------------------------------------------------------------------------|---------------------------|--------------------------------------|-----------------------|------------|
| <i>Controls with low NO<sub>x</sub> exposure(reference) vs. PE cases and high NO<sub>x</sub> exposure</i>                              |                                                                                                 |                           |                                      |                       |            |
| GO:0072080                                                                                                                             | nephron tubule development                                                                      | 88                        | 5                                    | 0.000027              | 0.30       |
| GO:0061326                                                                                                                             | renal tubule development                                                                        | 90                        | 5                                    | 0.000031              | 0.30       |
| GO:0050508                                                                                                                             | glucuronosyl-N-acetylglucosaminyl-proteoglycan 4-alpha-N-acetylglucosaminyltransferase activity | 3                         | 2                                    | 0.000049              | 0.30       |
| GO:0072009                                                                                                                             | nephron epithelium development                                                                  | 104                       | 5                                    | 0.000053              | 0.30       |
| GO:0009595                                                                                                                             | detection of biotic stimulus                                                                    | 29                        | 3                                    | 0.000081              | 0.37       |
| GO:0072006                                                                                                                             | nephron development                                                                             | 137                       | 5                                    | 0.000187              | 0.56       |
| GO:0072088                                                                                                                             | nephron epithelium morphogenesis                                                                | 72                        | 4                                    | 0.000198              | 0.56       |
| GO:0072073                                                                                                                             | kidney epithelium development                                                                   | 135                       | 5                                    | 0.000203              | 0.56       |
| GO:0072028                                                                                                                             | nephron morphogenesis                                                                           | 74                        | 4                                    | 0.000222              | 0.56       |
| GO:0032490                                                                                                                             | detection of molecule of bacterial origin                                                       | 11                        | 2                                    | 0.000371              | 0.71       |
| GO:0072257                                                                                                                             | metanephric nephron tubule epithelial cell differentiation                                      | 7                         | 2                                    | 0.000402              | 0.71       |
| GO:0072307                                                                                                                             | regulation of metanephric nephron tubule epithelial cell differentiation                        | 7                         | 2                                    | 0.000402              | 0.71       |
| <i>Controls with high NO<sub>x</sub> exposure (reference) vs. PE cases with high NO<sub>x</sub> exposure</i>                           |                                                                                                 |                           |                                      |                       |            |
| GO:0032570                                                                                                                             | response to progesterone                                                                        | 44                        | 4                                    | 0.000270              | 1          |
| GO:0051016                                                                                                                             | barbed-end actin filament capping                                                               | 20                        | 3                                    | 0.000544              | 1          |
| GO:0005996                                                                                                                             | monosaccharide metabolic process                                                                | 270                       | 8                                    | 0.000620              | 1          |
| GO:2000813                                                                                                                             | negative regulation of barbed-end actin filament capping                                        | 4                         | 2                                    | 0.000668              | 1          |
| GO:0009595                                                                                                                             | detection of biotic stimulus                                                                    | 29                        | 3                                    | 0.000729              | 1          |
| GO:2000812                                                                                                                             | regulation of barbed-end actin filament capping                                                 | 5                         | 2                                    | 0.000790              | 1          |
| GO:0001820                                                                                                                             | serotonin secretion                                                                             | 9                         | 2                                    | 0.000875              | 1          |
| GO:0016861                                                                                                                             | intramolecular oxidoreductase activity, interconverting aldoses and ketoses                     | 8                         | 2                                    | 0.000988              | 1          |
| GO:0032490                                                                                                                             | detection of molecule of bacterial origin                                                       | 11                        | 2                                    | 0.001350              | 1          |
| GO:0019318                                                                                                                             | hexose metabolic process                                                                        | 230                       | 7                                    | 0.001428              | 1          |
| <i>Female pregnancies only - Controls with high NO<sub>x</sub> exposure (reference) vs. PE cases with high NO<sub>x</sub> exposure</i> |                                                                                                 |                           |                                      |                       |            |
| GO:0099186                                                                                                                             | structural constituent of postsynapse                                                           | 10                        | 6                                    | 0.000003              | 0.06       |
| GO:0098918                                                                                                                             | structural constituent of synapse                                                               | 16                        | 7                                    | 0.000013              | 0.15       |
| GO:0008089                                                                                                                             | anterograde axonal transport                                                                    | 48                        | 9                                    | 0.000106              | 0.66       |
| GO:0036464                                                                                                                             | cytoplasmic ribonucleoprotein granule                                                           | 209                       | 19.5                                 | 0.000117              | 0.66       |
| GO:0035770                                                                                                                             | ribonucleoprotein granule                                                                       | 220                       | 19.5                                 | 0.000218              | 0.97       |
| GO:0030705                                                                                                                             | cytoskeleton-dependent intracellular transport                                                  | 178                       | 18                                   | 0.000274              | 0.97       |
| GO:0035033                                                                                                                             | histone deacetylase regulator activity                                                          | 4                         | 3                                    | 0.000332              | 0.97       |
| GO:0003727                                                                                                                             | single-stranded RNA binding                                                                     | 93                        | 11                                   | 0.000343              | 0.97       |
| GO:0007006                                                                                                                             | mitochondrial membrane organization                                                             | 130                       | 13                                   | 0.000485              | 1          |
| GO:1904115                                                                                                                             | axon cytoplasm                                                                                  | 57                        | 9                                    | 0.000503              | 1          |

**Table S4.** Comparisons between the study populations included in the placental DNA methylation analyses and RNA sequencing analyses <sup>a</sup>.

| Characteristics                   | DNA methylation (n = 111) | RNA sequencing (n = 17) |
|-----------------------------------|---------------------------|-------------------------|
| Preeclampsia                      | 29 (26.1)                 | 10 (58.9)               |
| Maternal age                      |                           |                         |
| <35                               | 90 (81.1)                 | 14 (82.4)               |
| 35≤                               | 21 (18.9)                 | 3 (17.6)                |
| Maternal pregestational BMI       |                           |                         |
| <18.5                             | 1 (0.9)                   | 0                       |
| 18.5-24.9                         | 55 (49.5)                 | 7 (41.2)                |
| 25-29.9                           | 32 (28.8)                 | 2 (11.8)                |
| 30≤                               | 23 (20.7)                 | 8 (47.0)                |
| Maternal Parity                   |                           |                         |
| Nullipara                         | 77 (69.4)                 | 10 (58.8)               |
| Primipara                         | 26 (23.4)                 | 4 (23.5)                |
| Multipara                         | 8 (7.2)                   | 3 (17.6)                |
| Previous Gestational Hypertension | 2 (1.8)                   | 0                       |
| Mode of delivery                  |                           |                         |
| Vaginal                           | 89 (80.2)                 | 16 (92.3)               |
| Cesarean                          | 22 (19.8)                 | 1 (5.9)                 |
| Fetal sex                         |                           |                         |
| Male                              | 59 (53.2)                 | 8 (47.0)                |
| Female                            | 52 (46.8)                 | 9 (53.0)                |
| Gestational age by days           | 274.5±12.8                | 277 ± 7.8               |
| Preterm birth                     | 8 (7.2)                   | 0                       |
| Fetal weight (g)                  | 3432±621                  | 3655±383                |
| Year of birth                     |                           |                         |
| 2008                              | 21 (18.9)                 | 5 (29.4)                |
| 2009                              | 29 (26.1)                 | 4 (23.5)                |
| 2010                              | 2 (1.8)                   | 1 (5.9)                 |
| 2011                              | 21 (18.9)                 | 4 (29.4)                |
| 2014                              | 18 (16.2)                 | 1 (5.9)                 |
| 2015                              | 20 (18.0)                 | 2 (11.8)                |

<sup>a</sup> Mean, SD are presented for continuous variables, and numbers (percentages) are presented for categorical variables.

A)

| ↓ PE status NO <sub>x</sub> exposure → | Low            | High           |
|----------------------------------------|----------------|----------------|
| Control                                | Group 1 N = 45 | Group 2 N = 37 |
| Case                                   | Group 3 N = 10 | Group 4 N = 19 |

B)

| Pair-wise group comparisons          |                                          |
|--------------------------------------|------------------------------------------|
| Controls, high NO <sub>x</sub>       | VS. Controls, low No <sub>x</sub>        |
| PE cases, low NO <sub>x</sub>        | VS. Controls, low No <sub>x</sub>        |
| <b>PE cases, high NO<sub>x</sub></b> | <b>VS. Controls, low No<sub>x</sub></b>  |
| <b>PE cases, low NO<sub>x</sub></b>  | <b>VS. Controls, high No<sub>x</sub></b> |
| <b>PE cases, high NO<sub>x</sub></b> | <b>VS. Controls, high No<sub>x</sub></b> |
| PE cases, high NO <sub>x</sub>       | VS. PE cases, low NO <sub>x</sub>        |
| PE cases, low NO <sub>x</sub>        | VS. Controls, low No <sub>x</sub>        |

**Figure S1.** Summary of groups based on a combination of pregnancy status (PE or normotensive control) and exposure to ambient NO<sub>x</sub> (low or high NO<sub>x</sub> exposure based on median split) (Table A) and the pair-wise comparisons performed in the DMP analyses, where comparisons that had DMPs ( $q < 0.05$ ) are marked in bold (Table B).

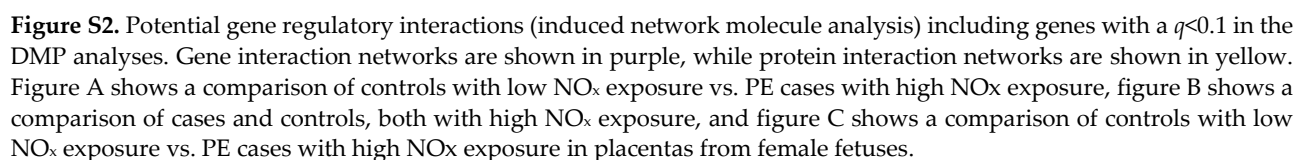

Supplement: s1 [file s1]
